# Supplementary material
Source: Research Square preprint supplement (doi:10.21203/rs.3.rs-10120763/v1)
Supplement: Supplementary file 1 [file 0c207e071d39a31c5010da2b.docx]

**Supporting Information (SI)**

**Defect Geometry and Concentration Controlled Excitonic Landscape in Monolayer MX2-family: A Systematic G0W0-BSE Study of Chalcogen Vacancies**

Shishir Timilsenaa, Sanju Guptab,c,*, Muhammad Idrees Bhattia, and Nicholas Dimakisa,*

aDepartment of Physics and Astronomy, University of Texas-Rio Grande Valley, Edinburg, TX 78539, USA

bDepartment of Physics, The Pennsylvania State University, University Park, PA 16802, USA

cDepartment of Physics and Astronomy, University of Georgia, Athens, GA 30602, USA

**Table T1.** Supercell sizes and corresponding lattice constants used for the DFT calculations of MoS2, MoSe2, and WSe2.

|  | **Supercell** | **Lattice Constant Å** |
| --- | --- | --- |
| **MoS2** | 4×4×1 | 12.77 |
| 2×2×1 | 6.38 |
| 1×1×1 | 3.19 (Ref [1]) |
| **MoSe2** | 4×4×1 | 13.29 |
| 2×2×1 | 6.64 |
| 1×1×1 | 3.32 (Ref [2]) |
| **WSe2** | 4×4×1 | 13.28 |
| 2×2×1 | 6.64 |
| 1×1×1 | 3.32 (Ref [3] ) |


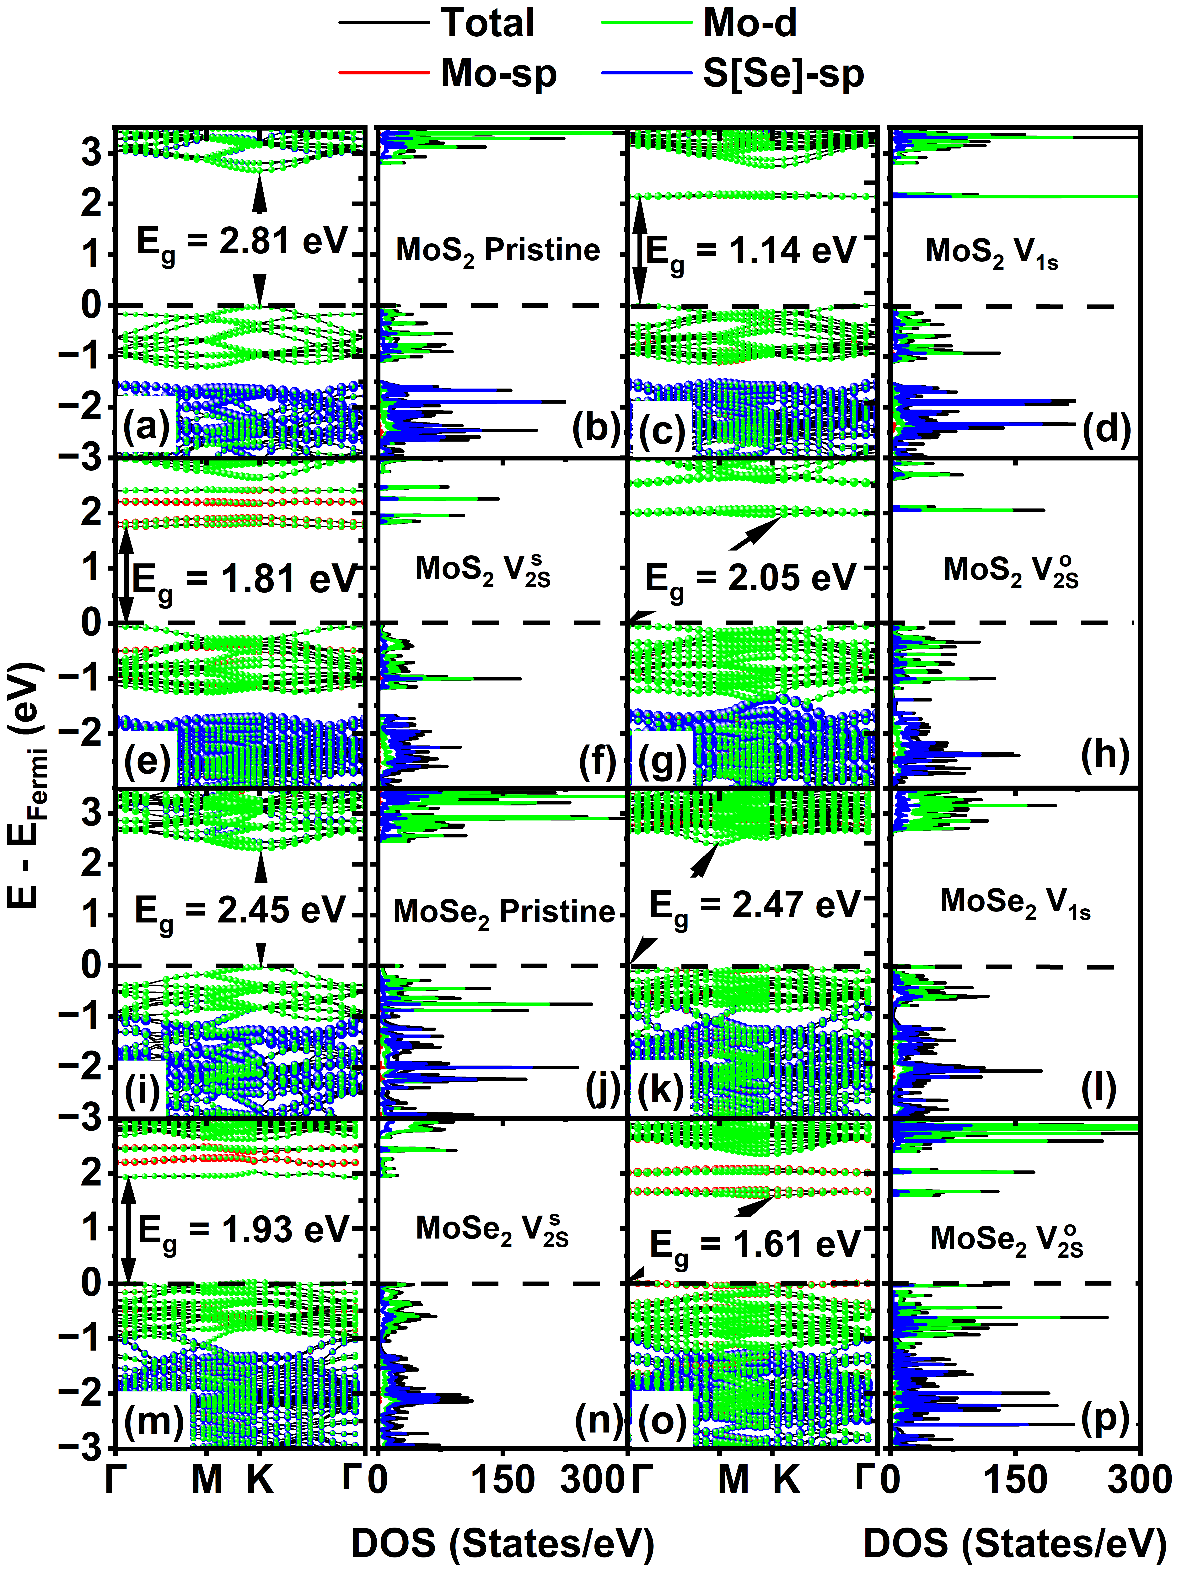


**Fig. S1.** Wannier-interpolated G0W0 band structures and corresponding G0W0 density of states (DOS), including both total and orbital-projected contributions, for pristine and defective 4×4 MoS2 and MoSe2 monolayers without spin–orbit coupling. Panels show (a, b) pristine MoS2, (c, d) MoS2 , (e, f) MoS2 , (g, h) MoS2 , (i, j) pristine MoSe2, (k, l) MoSe2 , (m, n) MoSe2 , and (o, p) MoSe2 . Black, red, green, and blue denote the total, metal-sp, metal-d, and S/Se-sp contributions, respectively. The arrows indicate the G0W0 band gaps, and the Fermi energy is set to zero. Here, , , and , denote a single chalcogen vacancy, two chalcogen vacancies in the same layer, and two chalcogen vacancies in opposite layers, respectively, where X = S or Se.


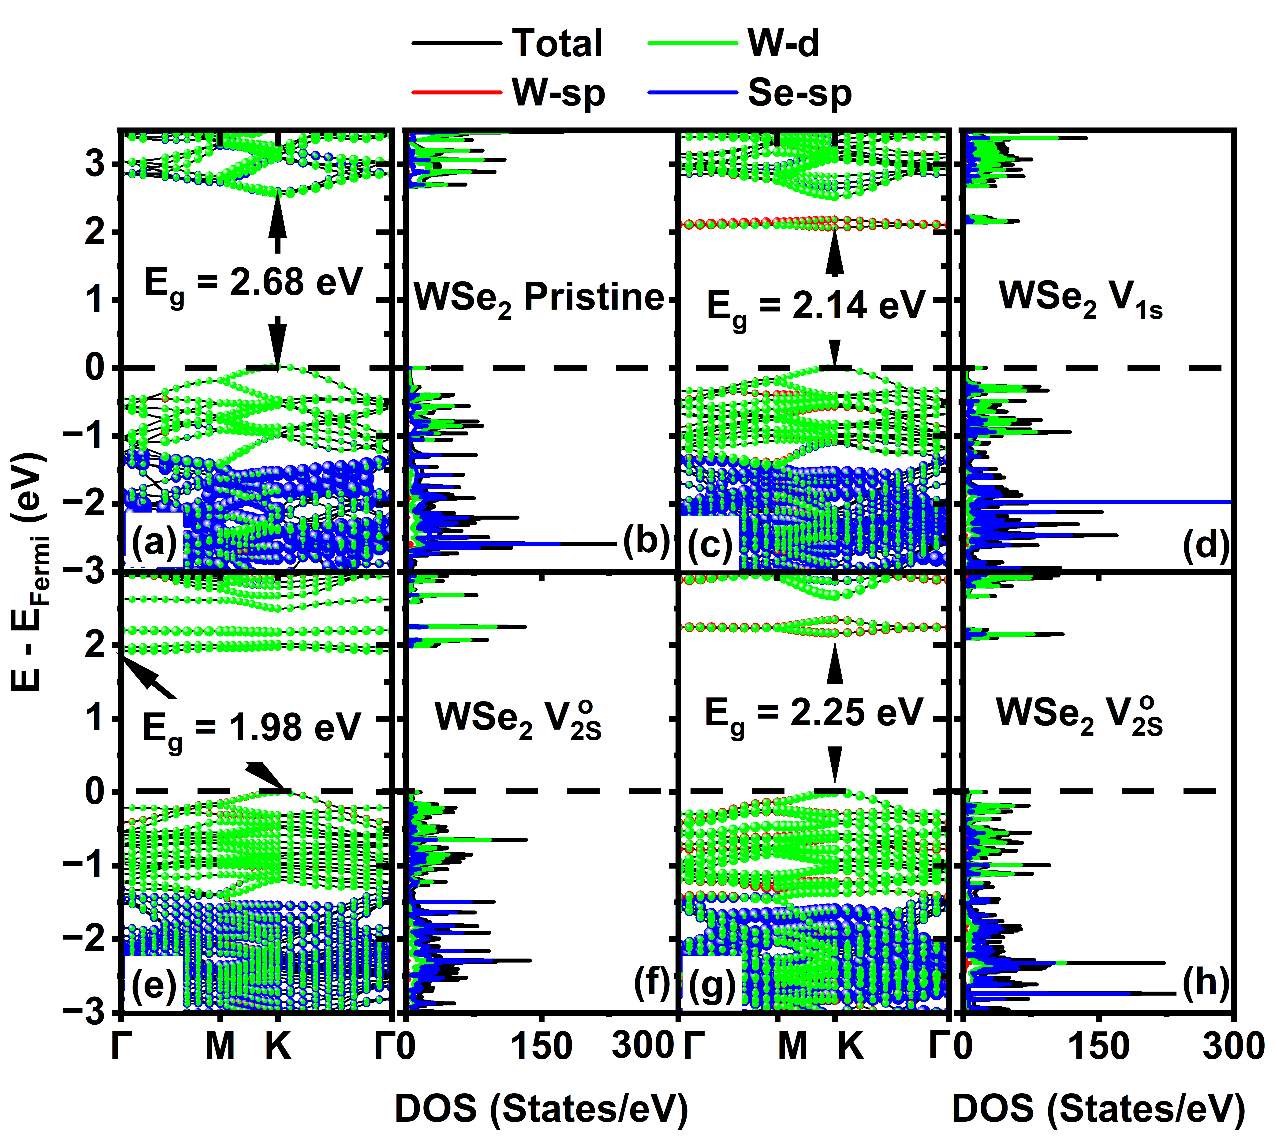


**Fig. S2.** Wannier-interpolated G0W0 band structures and corresponding G0W0 density of states (DOS), including both total and orbital-projected contributions, for pristine and defective 4×4 WSe2 monolayers without spin-orbit coupling. Panels show (a, b) pristine WSe2, (c, d) single Se vacancy , (e, f) same-layer Se divacancy , and (g, h) opposite-layer Se divacancy . Black, red, green, and blue denote total, W-sp, W-d, and Se-sp contributions, respectively. The arrows indicate the G0W0 band gaps, and the Fermi energy is set to zero.

**
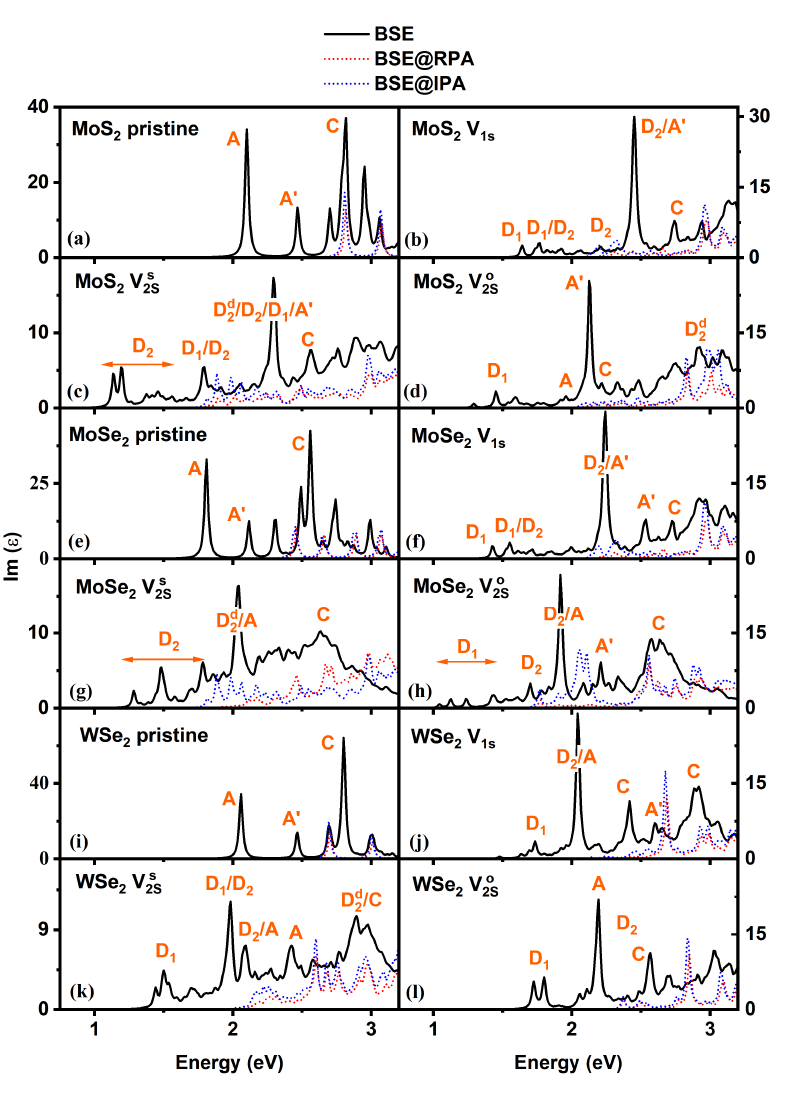
**

**Fig. S3.** In-plane component of the imaginary part of the dielectric function calculated for the 4×4 supercells of (a)-(d) MoS2, (e)-(h) MoSe2, and (i)-(l) WSe2 monolayers.Panels show (a, e, i) pristine monolayers, (b, f, j) single chalcogen vacancy ,  double chalcogen vacancies on the same layer (c, g, k) and (d,h,l) on opposite layers , where X = S or Se. Black, red, and blue curves correspond to the full BSE, BSE@RPA, and BSE@IPA spectra, respectively. RPA denotes the random-phase approximation, and IPA the independent-particle approximation. The labels A, B, A′, B′, and C denote bright, pristine-like excitonic features, whereas in defective spectra, these labels refer to perturbed, host-like excitons when they remain resolved.  Orange arrows in the defective spectra indicate the classified optical regions: or Deep *D2* corresponding to deep in-gap defect-to-defect transitions, *D2* corresponding to shallower defect-to-defect transitions, and *D1* corresponding to transitions from perturbed valence-band states to defect-derived states in the conduction band.

**Table S2.** Direct G0W0band gap (, exciton binding energy (), and approximate energy ranges and prominent peaks based on oscillator strength for the *D1*, Deep *D2*, *D2*, and the perturbed host-like excitonsof defective 2×2 supercells of MoS2, MoSe2, and WSe2 monolayers with spin–orbit coupling. The Brillouin zone was sampled using a Γ-centered 8×8×1 grid. D1denotesperturbed valence-to-defect band transitions, D2denotesdefect-to-defect band transitionsinvolving shallow defect states, and Deep *D2*denotes defect-to-defect transitions involving deeper vacancy-derived states. , , and, denote a single chalcogen vacancy, same-layer chalcogen divacancy, and opposite-layer chalcogen divacancy, respectively, where *X* = S or Se.

| **Defect** |  |  | **Optical Transition Energies (eV)** | | | |
| --- | --- | --- | --- | --- | --- | --- |
|  |  |  | **D1** | **Deep D2** | **D2** | **A-like / A′-like / upper perturbed** |
| **MoS2** | | | | | | |
|  | 1.56 | 0.57 | 1.13–1.50; 2.00 | 2.00; 2.15; 2.31; 2.44; 2.61 | 1.59–1.63; 2.00; 2.09 | 2.21–2.25a; 2.36b; 2.44c; 2.65d; 3.14e |
|  | 0.62 | 0.36 | 0.54–1.56; 1.81; 2.34; 2.41 | 1.53; 1.57; 1.68; 1.87–2.01; 2.05–2.20; 2.38; 2.42–2.54; 2.62–2.68 | 0.27–0.42; 0.79–0.86; 0.92–0.99; 1.12–1.14; 1.21–1.25; 1.26–1.31; 1.49; 1.51; 1.54; 1.57; 2.01 | 2.41a; 2.62 c; 2.72f; 2.79e |
|  | 1.27 | 0.51 | 1.38–1.53; 1.66–1.71; 1.74–1.79; 1.86–1.95; 2.11 | 1.57; 1.70–2.24; 2.56; 2.63; 2.77; 3.09 | 0.83–1.35; 1.39; 1.52; 1.67; 1.80 | 2.02a; 2.13b; 2.17c; 2.24d; 2.98e |
| **MoSe2** | | | | | | |
|  | 1.23 | 0.34 | 0.98–1.48; 1.78; 1.87 | 1.48–1.68; 1.80; 1.87; 1.91; 1.95; 2.02; 2.72 | 1.83–1.87; 1.88; 1.95; 2.14 | 1.79 a, 2.00c; 2.08f; 2.13b; 2.15 f; 2.60e |
|  | 0.61 | 0.33 | 0.43–0.83; 1.02–1.13; 1.19–1.30; 1.73; 1.86; 2.03; 2.21 | 1.00–1.48; 1.60–2.16; 2.28–2.36; 2.74–2.76 | 0.30; 0.85–0.90; 1.10; 1.14–1.17; 1.22; 1.26–1.27; 1.34; 1.41–1.49; 1.91; 2.12 | 2.34c,e |
|  | 1.13 | 0.49 | 1.44–1.60; 1.70–1.72; 1.77–1.81; 1.90–1.97 | 1.95; 2.01–2.07; 2.40; 2.66–2.67 | 0.71–0.81; 1.17–1.20 | 1.46–1.47 a; 1.54–1.55b; 1.64–1.66c; 1.76–1.78c; 1.81–1.86 c; 2.05f; 2.42e |
| **WSe2** | | | | | | |
|  | 1.27 | 0.32 | 0.95–1.64; 1.65–1.75; 1.78–1.82; 1.84–1.85; 1.88; 1.92; 2.07 | 1.87; 1.99; 2.03–2.06; 2.30–2.36; 2.38; 2.42; 2.47–2.48; 2.55–2.60; 2.81; | 1.63;1.65; 1.76; 1.80–1.83; 1.88; 1.94–1.96; 2.02–2.05; 2.09–2.14; 2.21–2.22; 2.28–2.36; 2.48 | 1.77–1.79a; 1.81b; 1.84c; 2.13f; 2.25e |
|  | 1.30 | 0.43 | 0.87–1.11; 1.18; 1.23; 1.34–1.39; 1.90; 2.04; 2.33 | 1.22; 1.29; 1.41; 1.52; 1.66; 1.84–1.96; 2.07; 2.16; 2.31–2.35; 2.51–2.64; 2.90 | 1.02–1.06; 1.10; 1.16–1.22; 1.25–1.46; 1.54–1.84; 2.36; 2.55 | 2.56e |
|  | 1.25 | 0.53 | 0.72–1.43; 1.68–1.70; 1.78; 2.08–2.11 | 1.83; 1.88; 2.10–2.16; 2.24; 2.30; 2.36; 2.41; 2.46–2.50 | 1.83–1.84; 1.87; 1.90; 2.00–2.06; 2.12–2.20; 2.32 | 1.62a; 1.79–1.84b; 1.87–1.91c; 1.96d; 2.00f; 2.31e |

Perturbed excitons are labeled as follows: a A-like; b B-like; c A′-like; d B′-like; e higher-lying mixed/C-like; f 3s/3p Rydberg state.

**Table S3**. Direct G0W0band gap (, exciton binding energy (), and approximate energy ranges and prominent peaks based on oscillator strength for the *D1*, Deep *D2*, *D2*, and the perturbed host-like excitonsof defective 4×4 supercells of MoS2, MoSe2, and WSe2 monolayers without spin–orbit coupling. The Brillouin zone was sampled using a Γ-centered 4×4×1 grid. D1denotesperturbed valence-to-defect band transitions, D2denotesdefect-to-defect band transitionsinvolving shallow defect states, and Deep *D2*denotes defect-to-defect transitions involving deeper vacancy-derived states. , , and, denote a single chalcogen vacancy, same-layer chalcogen divacancy, and opposite-layer chalcogen divacancy, respectively, where *X* = S or Se.

| **Defect** |  |  | **Optical Transition Energies (eV)** | | | |
| --- | --- | --- | --- | --- | --- | --- |
|  |  |  | **D1** | **Deep D2** | **D2** | **A-like / A′-like / upper perturbed** |
| **MoS2** | | | | | | |
|  | 2.14 | 0.72 | 1.64–1.86 |  | 1.76; 1.90; 1.93–2.46 | 2.46i; 2.54a; 2.68b; 2.73c |
|  | 1.81 | 0.68 | 1.78–1.80; 1.91; 2.28 | 2.24; 2.29; 2.30–2.31; 2.36; 2.54; 2.81; 2.88; 2.96 | 1.14–1.56; 1.84; 1.92–2.05; 2.27 | 2.29–2.31vi; 2.54c |
|  | 2.06 | 0.77 | 1.45; 1.59 | 2.92–3.02 | 1.29; 1.57; 1.96–2.12 | 1.95v; 2.13b; 2.21c |
| **MoSe2** | | | | | | |
|  | 2.14 | 0.71 | 1.43–1.52; 1.55ii; 1.56–1.65; 1.69ii |  | 1.55ii;1.69ii; 1.72–2.25 | 2.25i; 2.33a; 2.53b; 2.51c |
|  | 1.93 | 0.65 | 1.94; 2.04 | 2.05; 2.41–2.42 | 1.28–1.91; 1.97–2.03; 2.06; 2.19; 2.23–2.24; 2.31 | 2.05 a; 2.19iii; 2.26–2.66c; 2.53iv; 2.67b |
|  | 1.66 | 0.62 | 1.04–1.44 | 2.09; 2.23–2.33; 2.63–2.78 | 1.52–1.93 | 1.92a;2.32b; 2.64b; 2.54–2.78c |
| **WSe2** | | | | | | |
|  | 2.14 | 0.51 | 1.63–1.96 | 2.81–2.84; 2.87–2.94 | 2.04; 2.20; 2.39; 2.61; 2.69 | 2.04a; 2.16i; 2.33–2.65c; 2.66b; 2.78i; 2.81–2.87c; 2.88d; 2.90c |
|  | 2.09 | 0.65 | 1.44–1.75; 1.96–1.99; 2.07; 2.11; 2.30 | 2.43–2.46; 2.52iv; 2.58; 2.76; 2.77iv; 2.83iv; 2.89iv; 2.94–2.96 | 1.88–1.95; 1.97; 2.00; 2.06; 2.08–2.10; 2.16–2.24; 2.31; 2.34; 2.49; 2.58; | 2.09a; 2.13v; 2.16v; 2.18; 2.24b; 2.27a; 2.42a; 2.46a; ≥2.41c |
|  | 2.09 | 0.54 | 1.72–1.80 | 2.77; 2.88–2.91; 2.96 | 2.06–2.17; 2.27; 2.34; 2.40; 2.48–2.49; 2.55; 2.57; 2.59; 2.69i; 2.71iii; 2.75 | 2.19a; 2.35b; 2.54a; 2.56–2.68c; ≥2.71c |

Perturbed excitons are labeled as follows: a A-like; b A′-like; c higher-lying mixed/C-like; d 3s/3p Rydberg state. Mixed excitons as follows: i D2+A'; ii D1+D2; iii Deep D2+ higher-lying mixed/C-like; iv Deep D2+A-like; v D1+A-like.

**References**

[1] S. Ahmad, S. Mukherjee, A comparative study of electronic properties of bulk MoS2 and its monolayer using DFT technique: application of mechanical strain on MoS2 monolayer, Graphene, 3 (2014) 52–59.

[2] Y. Feng, H. Bai, M. An, Y. Wu, X. Wang, Density functional theory study of the electronic and optical properties of SnSe2/MoSe2 heterostructures under strain and electric field: implications for optoelectronic devices, ACS Applied Nano Materials, 6 (2023) 15795–15806.

[3] Y. Wang, X. Zhang, On the role of crystal defects on the lattice thermal conductivity of monolayer WSe2 (P63/mmc) thermoelectric materials by DFT calculation, Superlattices and Microstructures, 160 (2021) 107057.
